# Supplementary material for: Differing Roles for TCF4 and COL8A2 in Central Corneal Thickness and Fuchs Endothelial Corneal Dystrophy
Source: PLoS One. 2012 Oct 23;7(10):e46742. doi: 10.1371/journal.pone.0046742 (PMC3479099; doi:10.1371/journal.pone.0046742)
Supplement: Table S2 — Results from association tests for FECD severity grade (worse eye). Statistical models are FECD severity grade adjusted for age and sex (FECD Grade ∼ age, sex) and grade adjusted for age, sex and CCT in the eye with more advanced FECD (FECD Severity Grade ∼ age, sex, worse CCT). The percentage trait variance accounted for by each SNP (perc. var.), effect size in FECD grade units (Effect), 95% CI and p value are given for each test. (XLS) [file pone.0046742.s003.xls]

## Sheet: FECD_Grade_CI
						FECD Severity Grade ~ age, sex								FECD Severity Grade ~ age, sex, worse CCT
						Additive Model				Dominant Model				Additive Model				Dominant Model
Chrom	SNP	Position	Gene	Minor_Allele	Other_Allele	perc_var	Effect	95%_CI	p_value	perc_var	Effect	95%_CI	p_value	perc_var	Effect	95%_CI	p_value	perc_var	Effect	95%_CI	p_value
1	rs491603	36532316	COL8A2	T	C	0.17	-0.16	(-0.42, 0.10)	0.220758	0.26	-0.23	(-0.52, 0.07)	0.128303	0	0.06	(-0.24, 0.36)	0.689529	0	0.03	(-0.31, 0.37)	0.85373
1	rs538638	36534644		G	T	0.07	-0.15	(-0.51, 0.21)	0.424409	0.03	-0.09	(-0.48, 0.29)	0.627191	0	-0.01	(-0.43, 0.40)	0.944165	0	0.04	(-0.40, 0.47)	0.867032
1	rs3754076	36549157		A	G	0.22	-0.25	(-0.60, 0.11)	0.169086	0.14	-0.21	(-0.59, 0.17)	0.271006	0.14	0.23	(-0.20, 0.65)	0.29291	0.17	0.26	(-0.19, 0.71)	0.260671
1	rs3767703	36555758		T	C	0	-0.05	(-0.43, 0.34)	0.816671	0	-0.1	(-0.52, 0.31)	0.625165	0	0.02	(-0.43, 0.48)	0.920183	0	-0.01	(-0.50, 0.47)	0.955231
1	rs3738360	36563158		C	A	0.14	-0.21	(-0.56, 0.15)	0.255466	0.12	-0.2	(-0.58, 0.18)	0.301228	0.19	0.24	(-0.19, 0.66)	0.271091	0.24	0.27	(-0.18, 0.73)	0.234208
1	rs274754	36565617		G	A	0.15	-0.15	(-0.40, 0.11)	0.258238	0.16	-0.2	(-0.49, 0.10)	0.190414	0.02	-0.01	(-0.29, 0.26)	0.917799	0	-0.04	(-0.37, 0.29)	0.820213
1	rs4652900	36565999		A	G	0.05	-0.08	(-0.33, 0.16)	0.508218	0.1	-0.13	(-0.42, 0.15)	0.352501	0	0.06	(-0.23, 0.35)	0.701649	0	0.03	(-0.30, 0.36)	0.873279
1	rs7550047	36567343		G	A	0.04	-0.08	(-0.44, 0.29)	0.680484	0.03	-0.07	(-0.45, 0.32)	0.740632	0.01	-0.04	(-0.43, 0.36)	0.860831	0	-0.02	(-0.45, 0.40)	0.914974
1	rs7553155	36568236		A	T	0.1	-0.16	(-0.50, 0.18)	0.345604	0.13	-0.2	(-0.56, 0.17)	0.29098	0.06	-0.14	(-0.55, 0.26)	0.495525	0.05	-0.11	(-0.54, 0.31)	0.607499
1	rs96067	36571920		G	A	0.07	-0.1	(-0.36, 0.16)	0.445205	0.15	-0.17	(-0.46, 0.12)	0.257269	0	0	(-0.31, 0.30)	0.980145	0.01	-0.02	(-0.35, 0.32)	0.924495
1	rs12074848	36585077		C	T	0.03	-0.06	(-0.28, 0.16)	0.586663	0.05	-0.1	(-0.38, 0.18)	0.500507	0	0.04	(-0.21, 0.29)	0.761633	0	0.03	(-0.28, 0.35)	0.839664
1	rs11263857	36588402		A	G	0	-0.02	(-0.36, 0.32)	0.899763	0	-0.02	(-0.38, 0.34)	0.916667	0.08	0.17	(-0.22, 0.57)	0.39175	0.09	0.19	(-0.22, 0.59)	0.368108
1	rs11263858	36588952		G	C	0.03	-0.07	(-0.31, 0.18)	0.586585	0.03	-0.07	(-0.35, 0.21)	0.634004	0	0	(-0.28, 0.27)	0.973198	0	0.02	(-0.28, 0.33)	0.880136
1	rs12123086	36591612		A	G	0.01	-0.04	(-0.35, 0.28)	0.823727	0	-0.02	(-0.35, 0.31)	0.894404	0.03	0.14	(-0.22, 0.51)	0.431657	0.04	0.19	(-0.18, 0.57)	0.312129
1	rs7542594	36593856		A	G	0.21	-0.23	(-0.47, 0.01)	0.0628234	0.18	-0.29	(-0.57, -0.00)	0.046358	0	0.09	(-0.17, 0.36)	0.499301	0.01	0.09	(-0.22, 0.41)	0.55707
4	rs9790621	111530168	PITX2	A	G	0.03	0.03	(-0.23, 0.30)	0.801881	0.32	0.22	(-0.09, 0.52)	0.161891	0.01	0.04	(-0.25, 0.34)	0.767568	0.13	0.18	(-0.15, 0.52)	0.283687
4	rs4834295	111535206		T	G	0	-0.02	(-0.25, 0.22)	0.90063	0	0	(-0.28, 0.28)	0.993405	0.24	-0.16	(-0.43, 0.12)	0.26177	0.12	-0.12	(-0.44, 0.20)	0.465517
4	rs10024173	111538121		G	A	0.02	-0.06	(-0.34, 0.21)	0.650481	0.01	0.04	(-0.27, 0.34)	0.818636	0.02	0.04	(-0.27, 0.35)	0.792127	0.13	0.17	(-0.18, 0.52)	0.348506
4	rs3796902	111540468		A	G	0	-0.08	(-0.38, 0.23)	0.624569	0.02	0.02	(-0.32, 0.37)	0.897885	0	0.09	(-0.26, 0.43)	0.624766	0.01	0.18	(-0.21, 0.56)	0.373502
4	rs2595110	111545323		C	T	0.18	-0.13	(-0.33, 0.07)	0.209321	0.03	-0.07	(-0.35, 0.20)	0.612882	0	0	(-0.23, 0.24)	0.967651	0.11	0.25	(-0.07, 0.57)	0.124982
4	rs1947187	111545497		T	C	0.01	-0.03	(-0.29, 0.23)	0.806652	0.09	0.14	(-0.16, 0.44)	0.361607	0	0	(-0.30, 0.30)	0.987189	0.08	0.11	(-0.23, 0.46)	0.525241
4	rs17041972	111546755		A	G	0.04	-0.08	(-0.34, 0.19)	0.569403	0.04	-0.08	(-0.38, 0.21)	0.585324	0.08	0.13	(-0.18, 0.44)	0.400495	0.18	0.25	(-0.10, 0.60)	0.164745
4	rs7668322	111548596		G	T	0.03	-0.08	(-0.37, 0.21)	0.584646	0	0.01	(-0.32, 0.33)	0.964849	0.05	0.06	(-0.29, 0.41)	0.734631	0.14	0.16	(-0.22, 0.55)	0.410282
4	rs976568	111550721		G	T	0.17	-0.12	(-0.33, 0.08)	0.23396	0.33	-0.23	(-0.51, 0.05)	0.101797	0.37	-0.18	(-0.42, 0.06)	0.135249	0.36	-0.24	(-0.55, 0.08)	0.138546
4	rs994978	111552398		T	C	0.1	0.1	(-0.12, 0.32)	0.365432	0.07	0.11	(-0.17, 0.39)	0.442704	0.02	-0.02	(-0.28, 0.24)	0.89108	0.06	-0.05	(-0.37, 0.27)	0.747833
4	rs2723321	111554999		A	G	0.03	0.05	(-0.16, 0.27)	0.615358	0.02	0.05	(-0.21, 0.32)	0.698688	0	0.01	(-0.24, 0.26)	0.959908	0.02	-0.04	(-0.35, 0.27)	0.803706
4	rs2739200	111558411		C	G	0	0.02	(-0.20, 0.24)	0.860338	0	0.02	(-0.26, 0.30)	0.887926	0	-0.01	(-0.27, 0.25)	0.928711	0.02	-0.04	(-0.36, 0.27)	0.782277
4	rs62338989	111558994		A	G	0.02	0.08	(-0.15, 0.30)	0.507681	0	0.02	(-0.27, 0.30)	0.907086	0.06	0.06	(-0.19, 0.31)	0.620655	0	-0.04	(-0.35, 0.28)	0.817635
4	rs17554590	111562902		G	C	0.04	0.2	(-0.43, 0.82)	0.53702	0.04	0.18	(-0.46, 0.82)	0.573738	0.59	0.91	(0.23, 1.58)	0.00839789	0.61	0.96	(0.26, 1.66)	0.00734936
4	rs2595098	111563482		T	A	0.11	-0.2	(-0.60, 0.19)	0.317429	0.09	-0.19	(-0.61, 0.23)	0.378375	0.07	-0.11	(-0.54, 0.32)	0.611765	0.02	-0.05	(-0.51, 0.41)	0.836657
4	rs2197815	111566877		T	G	0.06	0.17	(-0.28, 0.62)	0.465059	0.05	0.16	(-0.30, 0.61)	0.498548	0.39	0.33	(-0.18, 0.84)	0.204254	0.39	0.33	(-0.18, 0.84)	0.204254
4	rs1448818	111570223		C	A	0.04	-0.07	(-0.30, 0.16)	0.554464	0.03	-0.07	(-0.35, 0.20)	0.595884	0.16	-0.09	(-0.36, 0.18)	0.523747	0.1	-0.06	(-0.38, 0.25)	0.687722
4	rs1982360	111571042		T	C	0	0.02	(-0.20, 0.24)	0.861736	0	0.03	(-0.25, 0.30)	0.839748	0	0.09	(-0.17, 0.34)	0.493714	0	0.05	(-0.26, 0.37)	0.732752
9	rs1409832	137428425	COL5A1	G	T	0.01	0.03	(-0.19, 0.26)	0.772842	0.02	0.06	(-0.22, 0.34)	0.661327	0.09	0.08	(-0.18, 0.35)	0.53942	0.12	0.13	(-0.20, 0.45)	0.447082
9	rs4842044	137431904		T	C	0.02	0.07	(-0.14, 0.29)	0.50889	0	0.03	(-0.25, 0.32)	0.820088	0	0	(-0.24, 0.24)	0.972149	0	0.03	(-0.28, 0.34)	0.852646
9	rs1536478	137432248		T	C	0	0	(-0.21, 0.22)	0.969515	0	0.01	(-0.27, 0.29)	0.950712	0	0.04	(-0.19, 0.28)	0.720479	0	0.06	(-0.25, 0.37)	0.704796
9	rs7044529	137568051		T	C	0.04	-0.09	(-0.36, 0.18)	0.518749	0.07	-0.1	(-0.40, 0.20)	0.521401	0	0.02	(-0.29, 0.33)	0.915331	0.03	-0.05	(-0.41, 0.30)	0.759181
10	rs3758455	31615249	ZEB1	T	C	0.05	-0.18	(-0.62, 0.26)	0.429009	0.01	-0.1	(-0.58, 0.38)	0.683124	0.05	-0.15	(-0.64, 0.33)	0.537988	0.03	-0.12	(-0.65, 0.40)	0.644993
10	rs6481745	31632661		G	A	0.04	-0.13	(-0.55, 0.29)	0.53478	0.01	-0.09	(-0.55, 0.38)	0.716996	0.09	-0.2	(-0.70, 0.29)	0.424218	0.06	-0.17	(-0.70, 0.37)	0.537475
10	rs9299657	31634713		A	G	0.22	0.17	(-0.06, 0.40)	0.154266	0.27	0.22	(-0.06, 0.50)	0.116746	0.01	-0.06	(-0.34, 0.21)	0.654751	0	-0.06	(-0.39, 0.26)	0.709832
10	rs7091882	31649119		C	A	0.02	-0.09	(-0.50, 0.32)	0.653546	0	-0.04	(-0.49, 0.41)	0.854558	0.06	-0.23	(-0.72, 0.26)	0.352511	0.03	-0.2	(-0.73, 0.32)	0.45061
10	rs2839657	31655768		T	C	0.01	0.02	(-0.17, 0.22)	0.817929	0.01	0.05	(-0.25, 0.35)	0.751892	0.06	0.12	(-0.11, 0.34)	0.297352	0.13	0.18	(-0.16, 0.52)	0.296546
10	rs2839659	31669794		T	C	0.01	0.02	(-0.19, 0.23)	0.841759	0.02	0.03	(-0.27, 0.33)	0.861247	0.09	0.09	(-0.14, 0.31)	0.433469	0.02	0.09	(-0.24, 0.41)	0.597183
10	rs161279	31684697		C	G	0.12	-0.22	(-0.64, 0.19)	0.293019	0.07	-0.18	(-0.63, 0.27)	0.426425	0.03	-0.13	(-0.63, 0.36)	0.594618	0.01	-0.1	(-0.63, 0.43)	0.711494
10	rs184394	31728496		C	T	0.14	-0.17	(-0.59, 0.26)	0.445743	0.09	-0.13	(-0.60, 0.34)	0.581771	0.09	-0.21	(-0.70, 0.28)	0.401492	0.05	-0.17	(-0.70, 0.35)	0.515843
10	rs223531	31740091		T	C	0.03	-0.12	(-0.60, 0.37)	0.640643	0	-0.05	(-0.59, 0.49)	0.855496	0.08	-0.21	(-0.71, 0.30)	0.4264	0.05	-0.18	(-0.75, 0.39)	0.537938
10	rs12217563	31741273		C	T	0.63	0.27	(0.04, 0.49)	0.0195727	0.47	0.29	(0.01, 0.57)	0.0436547	0.01	-0.02	(-0.28, 0.24)	0.874403	0.02	-0.05	(-0.37, 0.28)	0.776119
10	rs7894637	31747816		C	T	0.05	-0.27	(-0.71, 0.18)	0.241476	0.01	-0.22	(-0.70, 0.27)	0.378399	0.12	-0.31	(-0.79, 0.17)	0.211257	0.09	-0.32	(-0.84, 0.20)	0.229166
10	rs161231	31755920		T	C	0.04	-0.14	(-0.58, 0.30)	0.535521	0.03	-0.12	(-0.60, 0.35)	0.612621	0.39	-0.45	(-0.96, 0.05)	0.0789241	0.34	-0.46	(-1.02, 0.09)	0.0994203
10	rs696206	31776522		G	A	0.4	-0.41	(-0.84, 0.01)	0.0579842	0.28	-0.41	(-0.89, 0.07)	0.0961218	0.02	-0.07	(-0.53, 0.40)	0.777534	0	-0.01	(-0.53, 0.50)	0.95673
10	rs1761379	31783338		T	C	0.09	-0.2	(-0.63, 0.23)	0.358319	0.07	-0.2	(-0.66, 0.27)	0.411065	0.3	-0.37	(-0.88, 0.14)	0.150091	0.26	-0.37	(-0.93, 0.19)	0.192023
10	rs220059	31789715		C	T	0.33	-0.42	(-0.92, 0.07)	0.0927998	0.27	-0.41	(-0.94, 0.12)	0.128239	0.43	-0.45	(-0.99, 0.08)	0.0949263	0.34	-0.43	(-0.99, 0.14)	0.137106
10	rs2839664	31791501		G	A	0.01	-0.03	(-0.29, 0.22)	0.801414	0	-0.01	(-0.31, 0.28)	0.936037	0.01	0.02	(-0.26, 0.29)	0.892426	0.08	0.08	(-0.24, 0.40)	0.63508
10	rs1618092	31795212		C	T	0.06	0.07	(-0.12, 0.27)	0.457879	0.13	0.16	(-0.14, 0.46)	0.291354	0.05	0.04	(-0.18, 0.27)	0.703842	0.11	0.12	(-0.22, 0.46)	0.487549
10	rs2839666	31802782		C	T	0.1	0.14	(-0.15, 0.42)	0.345592	0.1	0.15	(-0.16, 0.46)	0.334567	0	-0.05	(-0.38, 0.28)	0.763968	0	-0.07	(-0.42, 0.29)	0.701348
10	rs220060	31803516		G	A	0.09	-0.21	(-0.67, 0.25)	0.36116	0.08	-0.21	(-0.72, 0.29)	0.409744	0.35	-0.46	(-0.99, 0.07)	0.0862234	0.3	-0.48	(-1.06, 0.10)	0.107592
10	rs172683	31806009		C	T	0.12	-0.25	(-0.70, 0.21)	0.293748	0.1	-0.25	(-0.75, 0.26)	0.334226	0.33	-0.45	(-0.98, 0.08)	0.0929493	0.28	-0.46	(-1.04, 0.11)	0.115832
10	rs11008516	31819360		G	T	0.04	0.08	(-0.21, 0.36)	0.58528	0	0.03	(-0.30, 0.37)	0.845852	0.01	0.03	(-0.29, 0.36)	0.833682	0	0.01	(-0.37, 0.40)	0.951864
10	rs12781751	31872826		C	T	0.06	0.07	(-0.12, 0.27)	0.477992	0.06	0.11	(-0.18, 0.40)	0.4523	0.01	-0.06	(-0.29, 0.18)	0.637886	0.02	0.03	(-0.32, 0.38)	0.874126
10	rs10763867	31874969		A	G	0.03	-0.05	(-0.25, 0.14)	0.585934	0.01	-0.04	(-0.32, 0.23)	0.75163	0.2	-0.11	(-0.33, 0.11)	0.31708	0.17	-0.18	(-0.49, 0.13)	0.252051
10	rs4747753	31877420		T	C	0.02	-0.04	(-0.24, 0.17)	0.730156	0.07	-0.08	(-0.36, 0.20)	0.592988	0.05	-0.05	(-0.28, 0.19)	0.693003	0.05	-0.11	(-0.42, 0.21)	0.516214
10	rs7092560	31885224		G	C	0.01	-0.03	(-0.25, 0.19)	0.781052	0.03	-0.08	(-0.35, 0.20)	0.581188	0.24	-0.19	(-0.44, 0.06)	0.13349	0.3	-0.27	(-0.59, 0.04)	0.091122
13	rs1034200	23228691	AVGR8	T	G	0.05	-0.04	(-0.27, 0.19)	0.724143	0.06	-0.07	(-0.35, 0.21)	0.632151	0.92	-0.35	(-0.60, -0.09)	0.00818294	0.63	-0.37	(-0.69, -0.06)	0.0189533
13	rs2755237	41109429	FOXO1	C	A	0.03	0.07	(-0.21, 0.35)	0.617067	0.04	0.09	(-0.21, 0.39)	0.542646	0.08	0.22	(-0.10, 0.53)	0.177974	0.05	0.26	(-0.08, 0.60)	0.13443
14	rs768787	33046471	AKAP6	T	G	0.15	-0.12	(-0.32, 0.08)	0.251197	0.26	-0.22	(-0.50, 0.06)	0.12329	0	-0.04	(-0.26, 0.18)	0.732347	0	-0.2	(-0.51, 0.11)	0.210943
15	rs6496932	85825567	AKAP13	A	C	0.15	-0.2	(-0.45, 0.06)	0.137345	0.24	-0.25	(-0.56, 0.05)	0.0977701	0.1	-0.12	(-0.41, 0.17)	0.412084	0.18	-0.18	(-0.51, 0.16)	0.295824
16	rs12447690	88298124	ZNF469	C	T	0	0.01	(-0.19, 0.22)	0.887014	0	0.03	(-0.25, 0.30)	0.858196	0.16	0.09	(-0.13, 0.32)	0.412104	0.31	0.2	(-0.11, 0.50)	0.206263
16	rs9938149	88331640		C	A	0	0.02	(-0.18, 0.22)	0.874225	0.05	0.09	(-0.19, 0.38)	0.518074	0.15	0.07	(-0.16, 0.30)	0.534856	0.46	0.22	(-0.10, 0.54)	0.177423
16	rs9925231	88338107		T	C	0.02	0.04	(-0.16, 0.24)	0.684381	0.29	0.23	(-0.06, 0.52)	0.115186	0.05	0.08	(-0.15, 0.31)	0.493148	0.55	0.37	(0.05, 0.69)	0.0219211
16	rs7204132	88344517		T	G	0.04	0.04	(-0.17, 0.25)	0.718595	0.35	0.2	(-0.09, 0.49)	0.179949	0.07	0.06	(-0.17, 0.29)	0.608398	0.4	0.26	(-0.05, 0.57)	0.101778
16	rs9927272	88346709		G	A	0.09	0.12	(-0.08, 0.33)	0.240482	0.13	0.19	(-0.11, 0.48)	0.209252	0.42	0.25	(0.03, 0.47)	0.0237095	0.43	0.43	(0.11, 0.75)	0.00810013
18	rs613872	53210302	TCF4	G	T	10.85	1.15	(0.93, 1.36)	4.78e-25	10.81	1.48	(1.20, 1.76)	5.91e-25	9.58	1.02	(0.78, 1.27)	2.15e-16	9.28	1.31	(0.98, 1.64)	4.23e-15
20	rs4815576	3199446	SLC4A11	G	C	0	-0.07	(-0.28, 0.13)	0.488729	0	-0.13	(-0.43, 0.17)	0.394963	0.01	-0.03	(-0.25, 0.19)	0.803364	0.02	-0.06	(-0.39, 0.27)	0.716118
20	rs2422862	3199703		G	A	0.1	0.23	(-0.04, 0.51)	0.0965817	0.05	0.23	(-0.07, 0.54)	0.138587	0.04	0.11	(-0.20, 0.43)	0.476194	0.1	0.14	(-0.20, 0.48)	0.420629
20	rs6037506	3199769		T	C	0.04	-0.06	(-0.26, 0.14)	0.563833	0.12	-0.15	(-0.45, 0.14)	0.298892	0.01	-0.08	(-0.31, 0.15)	0.494897	0.06	-0.14	(-0.48, 0.20)	0.427383
20	rs2422863	3201966		C	T	0.09	0.12	(-0.15, 0.40)	0.381027	0.05	0.1	(-0.20, 0.40)	0.525001	0	0.04	(-0.28, 0.36)	0.822185	0	0.07	(-0.28, 0.42)	0.701078
20	rs6139034	3202069		T	C	0.01	-0.04	(-0.27, 0.19)	0.763394	0.03	0.08	(-0.20, 0.36)	0.58512	0.02	0.02	(-0.24, 0.28)	0.882373	0.07	0.05	(-0.26, 0.37)	0.737325
20	rs6139035	3202129		C	T	0.01	0.05	(-0.17, 0.26)	0.663167	0.07	0.16	(-0.11, 0.43)	0.238546	0.09	0.07	(-0.17, 0.31)	0.564494	0.17	0.18	(-0.13, 0.49)	0.257936
20	rs13830	3204231		A	G	0.05	-0.13	(-0.51, 0.25)	0.490223	0.03	-0.11	(-0.50, 0.29)	0.597814	0.09	-0.18	(-0.61, 0.25)	0.407321	0.06	-0.13	(-0.58, 0.31)	0.555911
20	rs6051655	3206068		A	G	0.02	0.05	(-0.19, 0.29)	0.67808	0.01	0.05	(-0.24, 0.34)	0.721675	0	-0.01	(-0.28, 0.26)	0.968481	0	0.02	(-0.30, 0.35)	0.883041
20	rs3810560	3207819		C	T	0	0.01	(-0.20, 0.21)	0.949164	0	0.01	(-0.30, 0.32)	0.947555	0.03	0.03	(-0.19, 0.25)	0.791888	0.01	0.1	(-0.23, 0.44)	0.541343
20	rs2281575	3209371		A	G	0	-0.01	(-0.20, 0.19)	0.957406	0.02	0.06	(-0.23, 0.35)	0.667836	0.07	0.07	(-0.15, 0.29)	0.547984	0.15	0.15	(-0.18, 0.48)	0.372704
20	rs6139039	3210692		A	G	0	-0.01	(-0.21, 0.19)	0.912877	0.03	-0.07	(-0.37, 0.22)	0.621143	0	-0.04	(-0.26, 0.18)	0.717341	0	0.01	(-0.33, 0.36)	0.938809
20	rs6084312	3211235		T	C	0.02	0.06	(-0.26, 0.39)	0.69187	0.02	0.08	(-0.27, 0.43)	0.652857	0.11	-0.15	(-0.51, 0.21)	0.406189	0.13	-0.19	(-0.59, 0.20)	0.338332
20	rs2144771	3214020		G	T	0.05	-0.07	(-0.26, 0.13)	0.507657	0	0.01	(-0.29, 0.32)	0.929531	0.03	-0.02	(-0.24, 0.21)	0.867709	0	0.14	(-0.21, 0.49)	0.423328
20	rs3803955	3214126		T	C	0.01	0.03	(-0.18, 0.25)	0.764725	0.19	0.18	(-0.09, 0.45)	0.188169	0.47	0.21	(-0.05, 0.46)	0.111576	0.95	0.4	(0.09, 0.72)	0.0119175
20	rs3803956	3214581		A	G	0	0.01	(-0.24, 0.25)	0.959152	0	-0.02	(-0.31, 0.27)	0.897052	0	0.11	(-0.17, 0.40)	0.443352	0	0.12	(-0.22, 0.45)	0.495118
20	rs3827075	3214819		G	T	0.02	-0.04	(-0.23, 0.16)	0.691496	0	-0.02	(-0.30, 0.25)	0.867721	0.12	-0.09	(-0.32, 0.13)	0.407735	0.02	-0.05	(-0.37, 0.27)	0.771589
20	rs6051669	3216203		T	C	0.02	0.04	(-0.16, 0.24)	0.69201	0.09	0.09	(-0.19, 0.37)	0.51361	0.29	0.12	(-0.11, 0.34)	0.302801	0.52	0.26	(-0.07, 0.58)	0.119797
