# Supplementary material for: Differing Roles for TCF4 and COL8A2 in Central Corneal Thickness and Fuchs Endothelial Corneal Dystrophy
Source: PLoS One. 2012 Oct 23;7(10):e46742. doi: 10.1371/journal.pone.0046742 (PMC3479099; doi:10.1371/journal.pone.0046742)
Supplement: Table S3 — Results from association tests for CCT, adjusted for age and sex (CCT ∼ age, sex) or for age, sex, and FECD severity grade (worse eye) (CCT ∼ age, sex, FECD severity grade). Effect size is given in µm; otherwise, quantities are as in Table S2. (XLS) [file pone.0046742.s004.xls]

## Sheet: CCT_CI
						CCT ~ age, sex								CCT ~ age, sex, worse CCT
						Additive Model				Dominant Model				Additive Model				Dominant Model
Chrom	SNP	Position	Gene	Minor_Allele	Other_Allele	perc_var	Effect	95%_CI	p_value	perc_var	Effect	95%_CI	p_value	perc_var	Effect	95%_CI	p_value	perc_var	Effect	95%_CI	p_value
1	rs491603	36532316	COL8A2	T	C	1.45	-13.1	(-22.1, -4.1)	0.00425403	1.28	-14.5	(-24.8, -4.2)	0.00587511	0.86	-10.4	(-18.2, -2.6)	0.0090116	0.83	-11.6	(-20.5, -2.6)	0.0113375
1	rs538638	36534644		G	T	0.87	-14	(-26.3, -1.8)	0.0251159	0.7	-13.4	(-26.5, -0.4)	0.0433275	0.53	-10.8	(-21.3, -0.3)	0.0447509	0.48	-11	(-22.2, 0.2)	0.0546617
1	rs3754076	36549157		A	G	0.89	-14.8	(-26.9, -2.6)	0.0170164	0.65	-14	(-27.1, -0.9)	0.0355899	0.73	-13.2	(-23.6, -2.9)	0.0124421	0.61	-13.1	(-24.4, -1.9)	0.0216109
1	rs3767703	36555758		T	C	0.72	-14.9	(-27.9, -1.8)	0.0253673	0.85	-17.6	(-31.5, -3.6)	0.0138243	0.44	-11.4	(-22.6, -0.1)	0.0480934	0.51	-13.1	(-25.2, -1.0)	0.033422
1	rs3738360	36563158		C	A	0.95	-15.6	(-27.9, -3.4)	0.0125255	0.71	-15.1	(-28.3, -1.8)	0.0257304	0.81	-14.4	(-24.9, -3.9)	0.00736931	0.69	-14.6	(-26.0, -3.2)	0.0121792
1	rs274754	36565617		G	A	1.25	-11	(-19.3, -2.7)	0.00953127	1.02	-12	(-22.0, -2.0)	0.0186539	0.58	-8	(-15.1, -0.8)	0.0297998	0.49	-8.7	(-17.4, -0.1)	0.0471105
1	rs4652900	36565999		A	G	2.04	-14.8	(-23.4, -6.2)	0.000780583	1.59	-15.1	(-25.1, -5.1)	0.00304765	1.19	-11.6	(-19.1, -4.2)	0.00229642	0.93	-11.7	(-20.4, -3.1)	0.00790388
1	rs7550047	36567343		G	A	0.83	-14.1	(-26.1, -2.0)	0.0226572	1	-16.8	(-29.9, -3.7)	0.011699	0.38	-9.5	(-20.0, 0.9)	0.07308	0.5	-11.8	(-23.1, -0.5)	0.0399346
1	rs7553155	36568236		A	T	1.14	-16	(-27.9, -4.1)	0.00828893	1.08	-16.3	(-28.7, -3.9)	0.00998326	0.49	-10.4	(-20.7, -0.1)	0.0480687	0.48	-10.8	(-21.5, -0.0)	0.0489429
1	rs96067	36571920		G	A	1.55	-14	(-23.0, -5.1)	0.00198276	1.4	-15.1	(-25.1, -5.1)	0.00308811	0.79	-10	(-17.7, -2.4)	0.0103398	0.76	-11	(-19.6, -2.4)	0.012577
1	rs12074848	36585077		C	T	0.42	-5.8	(-13.2, 1.7)	0.127871	0.23	-5.6	(-15.1, 3.8)	0.240782	0.18	-4.1	(-10.5, 2.3)	0.207942	0.09	-3.8	(-12.0, 4.3)	0.356735
1	rs11263857	36588402		A	G	0.11	-4.7	(-16.4, 7.0)	0.429699	0.11	-4.7	(-16.7, 7.3)	0.444922	0.15	-5.7	(-15.7, 4.4)	0.267428	0.15	-5.9	(-16.2, 4.5)	0.265748
1	rs11263858	36588952		G	C	0.66	-7.8	(-16.1, 0.6)	0.0691141	0.67	-9	(-18.5, 0.4)	0.0612278	0.4	-6.2	(-13.5, 1.1)	0.0935529	0.51	-8	(-16.2, 0.3)	0.058485
1	rs12123086	36591612		A	G	0.32	-6.8	(-17.6, 4.1)	0.221908	0.29	-6.5	(-17.7, 4.8)	0.259175	0.27	-6.9	(-16.3, 2.5)	0.149917	0.27	-7.2	(-16.9, 2.5)	0.147425
1	rs7542594	36593856		A	G	1.09	-11.3	(-19.4, -3.2)	0.0061538	0.69	-10.7	(-20.3, -1.2)	0.0278912	0.64	-9	(-16.0, -2.0)	0.0120432	0.47	-8.9	(-17.1, -0.6)	0.0356094
4	rs9790621	111530168	PITX2	A	G	0.61	-8.2	(-17.0, 0.6)	0.0677282	0.21	-5	(-15.0, 5.0)	0.326195	0.49	-7.2	(-14.7, 0.4)	0.0620952	0.35	-6.7	(-15.3, 1.9)	0.125273
4	rs4834295	111535206		T	G	0	-0.1	(-8.3, 8.1)	0.975167	0.05	2.1	(-7.5, 11.7)	0.667739	0.07	2.6	(-4.5, 9.7)	0.476393	0.12	3.9	(-4.4, 12.2)	0.351847
4	rs10024173	111538121		G	A	0.5	-8.2	(-17.3, 1.0)	0.0795475	0.21	-6	(-16.3, 4.4)	0.259833	0.4	-7.2	(-15.1, 0.7)	0.0729153	0.29	-6.9	(-15.9, 2.0)	0.128116
4	rs3796902	111540468		A	G	0.34	-6.7	(-16.6, 3.1)	0.181154	0.09	-3.3	(-14.5, 7.8)	0.558449	0.25	-5.8	(-14.4, 2.7)	0.18161	0.12	-4.3	(-13.9, 5.4)	0.386186
4	rs2595110	111545323		C	T	0.19	-3.8	(-10.8, 3.1)	0.277186	0.23	-5.4	(-14.9, 4.1)	0.265336	0.09	-2.7	(-8.7, 3.3)	0.384541	0.29	-6.4	(-14.6, 1.7)	0.122715
4	rs1947187	111545497		T	C	0.66	-9.5	(-18.4, -0.6)	0.0373839	0.22	-6.4	(-16.7, 3.8)	0.215718	0.48	-7.7	(-15.4, -0.0)	0.0492514	0.28	-6.8	(-15.6, 2.0)	0.128501
4	rs17041972	111546755		A	G	0.36	-6.8	(-16.0, 2.4)	0.148822	0.66	-11	(-21.4, -0.5)	0.0405728	0.35	-6.8	(-14.7, 1.2)	0.0956622	0.71	-11	(-20.1, -2.0)	0.0165347
4	rs7668322	111548596		G	T	0.57	-9.9	(-20.3, 0.4)	0.06018	0.33	-8	(-19.5, 3.4)	0.169469	0.52	-9.3	(-18.2, -0.4)	0.0407687	0.41	-9.1	(-18.9, 0.8)	0.0705859
4	rs976568	111550721		G	T	0.01	1.8	(-5.6, 9.1)	0.63801	0.04	4	(-5.6, 13.6)	0.410309	0.17	4	(-2.3, 10.3)	0.20939	0.25	6.6	(-1.6, 14.9)	0.114061
4	rs994978	111552398		T	C	0.03	-1.1	(-8.7, 6.6)	0.78679	0.02	2.9	(-6.6, 12.3)	0.54972	0	-0.2	(-6.9, 6.4)	0.943934	0.07	3.2	(-5.0, 11.4)	0.441661
4	rs2723321	111554999		A	G	0.07	-2.2	(-9.7, 5.4)	0.573775	0	1.3	(-8.1, 10.6)	0.791347	0.02	-1.3	(-7.8, 5.3)	0.705529	0.02	1.8	(-6.3, 9.9)	0.665709
4	rs2739200	111558411		C	G	0.1	-2.8	(-10.3, 4.8)	0.472196	0	0	(-9.4, 9.4)	0.99645	0.03	-1.7	(-8.3, 4.8)	0.602244	0.01	0.9	(-7.3, 9.0)	0.833916
4	rs62338989	111558994		A	G	0.01	0.7	(-6.7, 8.1)	0.845111	0.02	1.3	(-8.1, 10.8)	0.780072	0.01	-0.7	(-7.1, 5.7)	0.829377	0.02	1.4	(-6.8, 9.5)	0.741513
4	rs17554590	111562902		G	C	0.04	4.2	(-15.9, 24.4)	0.679816	0.03	3.5	(-17.5, 24.6)	0.742297	0.06	-7.5	(-24.9, 10.0)	0.401203	0.07	-8.7	(-27.0, 9.6)	0.350404
4	rs2595098	111563482		T	A	0.08	-4.6	(-17.3, 8.2)	0.483727	0.07	-5	(-18.7, 8.7)	0.4757	0	-0.8	(-11.9, 10.2)	0.885339	0	-1.9	(-13.8, 9.9)	0.751901
4	rs2197815	111566877		T	G	0.19	-8.8	(-24.2, 6.5)	0.259849	0.19	-8.8	(-24.2, 6.5)	0.259849	0.39	-12.1	(-25.3, 1.1)	0.0727902	0.39	-12.1	(-25.3, 1.1)	0.0727902
4	rs1448818	111570223		C	A	0.01	-0.8	(-9.0, 7.3)	0.839653	0.02	1.9	(-7.6, 11.4)	0.691189	0.02	1.6	(-5.4, 8.6)	0.65404	0.1	3.8	(-4.4, 12.0)	0.366185
4	rs1982360	111571042		T	C	0.14	-3.3	(-10.9, 4.4)	0.402393	0	0.1	(-9.4, 9.6)	0.981735	0.06	-2.3	(-8.8, 4.3)	0.497013	0	0.7	(-7.4, 8.8)	0.864665
9	rs1409832	137428425	COL5A1	G	T	0.74	-8.7	(-16.4, -1.0)	0.0270609	0.73	-10.6	(-20.1, -1.1)	0.0283749	0.63	-7.8	(-14.4, -1.2)	0.0211867	0.65	-9.8	(-17.9, -1.6)	0.0189806
9	rs4842044	137431904		T	C	0.05	2.1	(-5.1, 9.2)	0.571011	0.01	-1	(-10.4, 8.4)	0.83411	0.03	1.6	(-4.5, 7.8)	0.605137	0	-0.6	(-8.7, 7.5)	0.887493
9	rs1536478	137432248		T	C	0.04	1.7	(-5.4, 8.8)	0.644104	0.02	-1.8	(-11.2, 7.6)	0.707638	0.02	1.4	(-4.7, 7.5)	0.661292	0.01	-1	(-9.1, 7.0)	0.799559
9	rs7044529	137568051		T	C	0.41	-7.5	(-16.8, 1.9)	0.117498	0.39	-8.4	(-18.8, 2.0)	0.113552	0.25	-5.8	(-13.8, 2.2)	0.15742	0.2	-5.7	(-14.7, 3.2)	0.207482
10	rs3758455	31615249	ZEB1	T	C	0	-1.1	(-15.9, 13.8)	0.887296	0	-1.5	(-17.6, 14.6)	0.855587	0.03	1.8	(-11.1, 14.7)	0.785508	0.02	1.2	(-12.9, 15.2)	0.871766
10	rs6481745	31632661		G	A	0.01	1.6	(-13.5, 16.8)	0.834035	0.01	1.5	(-14.9, 17.9)	0.859947	0.07	4.7	(-8.4, 17.9)	0.4792	0.06	4.5	(-9.8, 18.7)	0.539303
10	rs9299657	31634713		A	G	0.55	7.7	(-0.4, 15.7)	0.0621751	0.6	9.3	(-0.2, 18.8)	0.0551515	0.33	6.1	(-0.8, 13.1)	0.0841511	0.32	7.1	(-1.1, 15.3)	0.0893028
10	rs7091882	31649119		C	A	0.01	2.5	(-12.5, 17.5)	0.744803	0.02	2.4	(-13.8, 18.7)	0.770164	0.06	4.8	(-8.1, 17.8)	0.464631	0.05	4.4	(-9.6, 18.4)	0.540779
10	rs2839657	31655768		T	C	0.05	-1.8	(-8.6, 5.1)	0.612578	0.06	-2.9	(-13.1, 7.4)	0.586771	0.1	-2.7	(-8.6, 3.2)	0.36824	0.14	-4.7	(-13.5, 4.2)	0.302425
10	rs2839659	31669794		T	C	0.13	-2.5	(-9.4, 4.3)	0.463991	0.12	-3.7	(-13.5, 6.1)	0.460166	0.24	-3.7	(-9.6, 2.2)	0.216255	0.19	-4.8	(-13.3, 3.7)	0.270874
10	rs161279	31684697		C	G	0.01	1.9	(-13.2, 17.0)	0.804505	0.01	2	(-14.4, 18.3)	0.812766	0.06	4.7	(-8.4, 17.7)	0.482649	0.05	4.5	(-9.6, 18.6)	0.533785
10	rs184394	31728496		C	T	0.01	3	(-12.0, 18.0)	0.696328	0.02	3	(-13.3, 19.2)	0.721587	0.06	5.1	(-7.8, 18.1)	0.438229	0.05	4.7	(-9.3, 18.8)	0.510338
10	rs223531	31740091		T	C	0.05	7	(-9.0, 23.1)	0.390669	0.07	9.2	(-9.0, 27.4)	0.321468	0.21	9.7	(-4.2, 23.5)	0.172863	0.23	11.4	(-4.4, 27.1)	0.15663
10	rs12217563	31741273		C	T	0.84	7.9	( 0.3, 15.5)	0.0420102	0.58	8.3	(-1.1, 17.7)	0.0830827	0.54	6.8	( 0.1, 13.4)	0.0467415	0.39	7.2	(-1.0, 15.4)	0.084137
10	rs7894637	31747816		C	T	0.01	1.2	(-13.8, 16.2)	0.875164	0.01	1.2	(-15.0, 17.4)	0.885924	0.09	4.7	(-8.3, 17.7)	0.475273	0.07	4.7	(-9.4, 18.7)	0.515718
10	rs161231	31755920		T	C	0.03	4.9	(-10.7, 20.5)	0.538553	0.04	5.4	(-11.7, 22.4)	0.538574	0.2	9.3	(-4.3, 22.8)	0.179956	0.19	9.8	(-5.0, 24.5)	0.193775
10	rs696206	31776522		G	A	0.49	-12.5	(-26.1, 1.0)	0.0704413	0.61	-15.4	(-30.5, -0.3)	0.0459022	0.25	-8.5	(-20.2, 3.2)	0.155162	0.36	-11.5	(-24.5, 1.6)	0.0844425
10	rs1761379	31783338		T	C	0.04	4.1	(-11.6, 19.7)	0.60887	0.04	4.4	(-12.7, 21.5)	0.613004	0.2	8.8	(-4.8, 22.3)	0.203785	0.19	9.2	(-5.5, 24.0)	0.220346
10	rs220059	31789715		C	T	0	-1	(-17.7, 15.7)	0.90673	0	0.2	(-17.6, 18.1)	0.981095	0.1	6.6	(-7.9, 21.2)	0.369276	0.11	7.3	(-8.1, 22.8)	0.35155
10	rs2839664	31791501		G	A	0	0.5	(-7.9, 8.9)	0.909632	0.04	2.2	(-7.6, 12.0)	0.663175	0	0	(-7.3, 7.2)	0.994125	0	0.4	(-8.1, 8.8)	0.934249
10	rs1618092	31795212		C	T	0.06	-1.9	(-8.6, 4.9)	0.589219	0.06	-2.9	(-13.3, 7.4)	0.575131	0.11	-2.5	(-8.4, 3.3)	0.392902	0.15	-4.6	(-13.5, 4.3)	0.31074
10	rs2839666	31802782		C	T	0.21	5.9	(-4.0, 15.9)	0.242884	0.22	6.5	(-4.3, 17.3)	0.23491	0.11	4.4	(-4.2, 13.0)	0.316613	0.11	4.8	(-4.5, 14.1)	0.315658
10	rs220060	31803516		G	A	0.01	2.1	(-14.0, 18.1)	0.799587	0.01	1.8	(-15.8, 19.5)	0.838047	0.14	7.7	(-6.3, 21.6)	0.281215	0.13	7.8	(-7.5, 23.1)	0.317119
10	rs172683	31806009		C	T	0.01	2.1	(-14.1, 18.3)	0.796114	0.01	2.1	(-15.7, 19.9)	0.814749	0.14	7.7	(-6.3, 21.7)	0.282141	0.13	8	(-7.4, 23.3)	0.308402
10	rs11008516	31819360		G	T	0	0.9	(-8.9, 10.8)	0.851167	0	0.6	(-10.9, 12.2)	0.917506	0	-0.3	(-8.9, 8.3)	0.941363	0	-0.5	(-10.5, 9.5)	0.927879
10	rs12781751	31872826		C	T	1.27	8.4	( 1.7, 15.1)	0.0144688	0.98	11.2	( 1.0, 21.4)	0.0307527	0.78	7	( 1.2, 12.8)	0.0178805	0.39	7.7	(-1.1, 16.5)	0.0880853
10	rs10763867	31874969		A	G	0.88	7.2	( 0.5, 13.8)	0.0352491	0.64	8.7	(-0.8, 18.1)	0.071266	0.81	7.3	( 1.5, 13.0)	0.0133064	0.62	9	( 0.8, 17.1)	0.0304719
10	rs4747753	31877420		T	C	1.02	8.4	( 1.5, 15.2)	0.0162001	0.74	10.2	( 0.7, 19.6)	0.0353131	0.8	7.3	( 1.4, 13.2)	0.015306	0.59	9	( 0.8, 17.2)	0.0306586
10	rs7092560	31885224		G	C	1.34	10	( 2.6, 17.3)	0.00786557	0.99	11	( 1.6, 20.3)	0.0214545	1.16	9.8	( 3.4, 16.1)	0.0024746	1	11.6	( 3.5, 19.6)	0.00483499
13	rs1034200	23228691	AVGR8	T	G	0.61	6.7	(-0.9, 14.4)	0.0836519	0.47	7.4	(-1.9, 16.8)	0.119975	1.17	9.8	( 3.2, 16.4)	0.0035264	0.82	10.4	( 2.3, 18.5)	0.0118977
13	rs2755237	41109429	FOXO1	C	A	0.63	-7.7	(-17.1, 1.7)	0.10904	0.64	-8.5	(-18.7, 1.7)	0.103701	0.7	-8.7	(-16.8, -0.6)	0.0359395	0.68	-9.6	(-18.4, -0.7)	0.0335138
14	rs768787	33046471	AKAP6	T	G	0.09	-3.2	(-9.9, 3.5)	0.346749	0.02	-2.4	(-11.9, 7.2)	0.627407	0.03	-1.7	(-7.5, 4.1)	0.558463	0.01	0.7	(-7.6, 9.0)	0.867371
15	rs6496932	85825567	AKAP13	A	C	0.09	-3	(-11.5, 5.6)	0.49676	0.09	-3.6	(-13.6, 6.5)	0.487142	0.01	-0.8	(-8.2, 6.7)	0.842211	0	-0.3	(-9.0, 8.4)	0.943425
16	rs12447690	88298124	ZNF469	C	T	0.69	-6.6	(-13.5, 0.3)	0.0591871	0.37	-6.5	(-15.9, 3.0)	0.178724	0.67	-6.9	(-12.8, -0.9)	0.0235878	0.57	-8.6	(-16.8, -0.4)	0.0389449
16	rs9938149	88331640		C	A	0.72	-7.7	(-14.3, -1.0)	0.0243305	0.54	-9.3	(-18.8, 0.2)	0.0544007	0.73	-7.1	(-12.9, -1.4)	0.0153921	0.81	-10.6	(-18.9, -2.4)	0.0113935
16	rs9925231	88338107		T	C	0.39	-5	(-11.8, 1.7)	0.144954	0.31	-6.6	(-16.1, 3.0)	0.176944	0.43	-5.5	(-11.4, 0.3)	0.06329	0.73	-10.3	(-18.5, -2.0)	0.0146524
16	rs7204132	88344517		T	G	0.26	-4.5	(-11.4, 2.4)	0.200971	0.06	-2.8	(-12.3, 6.6)	0.555079	0.27	-4.5	(-10.5, 1.5)	0.138877	0.26	-5.9	(-14.1, 2.3)	0.155516
16	rs9927272	88346709		G	A	0.23	-4.3	(-10.9, 2.4)	0.208495	0.17	-5.2	(-14.9, 4.5)	0.290135	0.43	-5.8	(-11.6, -0.1)	0.0469985	0.38	-8.1	(-16.4, 0.3)	0.058092
18	rs613872	53210302	TCF4	G	T	4.15	18.6	(11.3, 25.9)	6.05e-07	4.47	25.5	(15.8, 35.2)	2.46e-07	0	-0.4	(-7.4, 6.6)	0.920685	0	0.7	(-8.6, 10.0)	0.88542
20	rs4815576	3199446	SLC4A11	G	C	0.01	1.3	(-5.5, 8.1)	0.700111	0.02	-1.2	(-11.3, 8.9)	0.817543	0.01	1.2	(-4.7, 7.1)	0.689609	0	-0.1	(-8.9, 8.6)	0.976197
20	rs2422862	3199703		G	A	0.06	2.4	(-6.9, 11.6)	0.617376	0	-0.6	(-10.8, 9.6)	0.914807	0	0.2	(-7.7, 8.2)	0.953661	0.04	-2.6	(-11.4, 6.2)	0.56812
20	rs6037506	3199769		T	C	0.05	1.9	(-4.9, 8.7)	0.588215	0.05	-3.1	(-13.2, 7.0)	0.544639	0.08	2.3	(-3.6, 8.1)	0.446271	0	-0.5	(-9.3, 8.2)	0.903711
20	rs2422863	3201966		C	T	0.14	4.2	(-5.3, 13.8)	0.385848	0.01	1.1	(-9.4, 11.6)	0.840107	0.05	2.6	(-5.7, 10.9)	0.536337	0	0	(-9.1, 9.1)	0.998554
20	rs6139034	3202069		T	C	0.21	-4	(-12.0, 3.9)	0.319388	0.22	-4.7	(-14.2, 4.8)	0.334818	0.19	-4	(-10.8, 2.9)	0.259902	0.3	-5.6	(-13.8, 2.6)	0.183029
20	rs6139035	3202129		C	T	0.28	-5	(-12.2, 2.3)	0.177268	0.35	-6.8	(-16.2, 2.5)	0.153518	0.29	-4.9	(-11.2, 1.4)	0.12649	0.41	-7.6	(-15.7, 0.6)	0.0680842
20	rs13830	3204231		A	G	0.46	12.6	(-0.2, 25.5)	0.0536699	0.36	11.7	(-1.6, 25.0)	0.0845858	0.38	11	(-0.0, 22.1)	0.0505397	0.28	9.9	(-1.6, 21.4)	0.0909453
20	rs6051655	3206068		A	G	0	-0.3	(-8.4, 7.9)	0.947954	0.01	-1.3	(-11.0, 8.5)	0.800277	0	0.1	(-6.9, 7.2)	0.968904	0.01	-1.3	(-9.7, 7.2)	0.768667
20	rs3810560	3207819		C	T	0.11	-2.9	(-9.4, 3.6)	0.382677	0.16	-5.3	(-15.1, 4.6)	0.293992	0.13	-3	(-8.6, 2.6)	0.29924	0.17	-5.1	(-13.6, 3.4)	0.239804
20	rs2281575	3209371		A	G	0.03	1.4	(-5.2, 7.9)	0.683854	0	0.1	(-9.9, 10.1)	0.984519	0	0	(-5.7, 5.7)	0.999039	0.03	-2.3	(-10.9, 6.3)	0.605089
20	rs6139039	3210692		A	G	0.05	-2.5	(-9.2, 4.2)	0.463354	0.35	-9.3	(-19.5, 0.9)	0.0751601	0.03	-1.6	(-7.4, 4.1)	0.575861	0.19	-6.9	(-15.7, 2.0)	0.12781
20	rs6084312	3211235		T	C	0.93	11.2	( 0.8, 21.6)	0.0348304	1.22	14.2	( 2.7, 25.8)	0.015519	0.74	10.9	( 2.0, 19.8)	0.0168225	0.94	13.7	( 3.8, 23.5)	0.00682722
20	rs2144771	3214020		G	T	0	-0.1	(-6.7, 6.5)	0.980675	0.02	-2	(-12.5, 8.4)	0.700934	0.01	0.8	(-4.9, 6.5)	0.781424	0.03	-2.6	(-11.5, 6.3)	0.56991
20	rs3803955	3214126		T	C	1.08	-10.5	(-18.1, -3.0)	0.0064203	0.71	-11	(-20.6, -1.5)	0.0232576	1.22	-10.8	(-17.4, -4.3)	0.00119105	1.18	-13.7	(-21.9, -5.4)	0.00112268
20	rs3803956	3214581		A	G	0.08	3.6	(-5.0, 12.2)	0.409645	0.23	7	(-3.1, 17.1)	0.17489	0.05	2.5	(-4.9, 9.9)	0.506738	0.15	5.2	(-3.6, 13.9)	0.247942
20	rs3827075	3214819		G	T	0.51	5.3	(-1.4, 12.0)	0.121156	0.11	3.4	(-6.4, 13.2)	0.493475	0.62	5.9	( 0.1, 11.7)	0.0480374	0.15	3.9	(-4.5, 12.4)	0.360605
20	rs6051669	3216203		T	C	1.02	-8.6	(-15.2, -2.0)	0.0110248	0.86	-11.7	(-21.3, -2.2)	0.0164027	1.05	-8.5	(-14.3, -2.8)	0.00357572	1.07	-12.7	(-21.0, -4.4)	0.00270909
