# Supplementary material for: Differing Roles for TCF4 and COL8A2 in Central Corneal Thickness and Fuchs Endothelial Corneal Dystrophy
Source: PLoS One. 2012 Oct 23;7(10):e46742. doi: 10.1371/journal.pone.0046742 (PMC3479099; doi:10.1371/journal.pone.0046742)
Supplement: Table S4 — Survey of the 1000 Genomes (October 2011) and Exome Variation Server (EVS) variant data on COL8A2 coding variants previously reported in the literature. Populations included are (list; including which make up European, African, East Asian, Hispanic). Data are grouped by variant, and at the top of each table are listed the physical map position (build 37) and the major and minor alleles (in European samples). 1000 Genomes data include numbers of individuals with 0 (m0), 1 (m1) and 2 copies of the minor allele, total major and minor alleles, and the minor allele frequency (MAF). EVS data include minor allele frequency in African Americans (AA) and Caucasians. (XLS) [file pone.0046742.s005.xls]

## Sheet: COL8A2_tallies
T645I		36563348	Major allele = G, minor allele = A
Group	m0	m1	m2	total_maj	total.min	MAF
LWK	97	0	0	194	0	0
YRI	87	0	0	174	0	0		EVS:
ASW	61	0	0	122	0	0		AA MAF =	0
CHB	97	0	0	194	0	0
CHS	100	0	0	200	0	0
JPT	89	0	0	178	0	0
CEU	82	0	0	164	0	0
FIN	93	0	0	186	0	0
GBR	86	1	0	173	1	0.00574713
IBS	14	0	0	28	0	0
TSI	98	0	0	196	0	0
CLM	60	0	0	120	0	0
PUR	55	0	0	110	0	0
MXL	66	0	0	132	0	0
All African	184	0	0	368	0	0
All East Asian	286	0	0	572	0	0
All European	373	1	0	747	1	0.0013369		CA MAF =	0.000142
All Hispanic	181	0	0	362	0	0
P586P	rs35841184	36563524	Major allele = G, minor allele = A
Group	m0	m1	m2	total_maj	total.min	MAF
LWK	97	0	0	194	0	0
YRI	87	0	0	174	0	0		EVS:
ASW	60	1	0	121	1	0.00819672		AA MAF =	0.00535
CHB	96	1	0	193	1	0.00515464
CHS	100	0	0	200	0	0
JPT	89	0	0	178	0	0
CEU	77	5	0	159	5	0.0304878
FIN	91	2	0	184	2	0.0107527
GBR	84	3	0	171	3	0.0172414
IBS	11	3	0	25	3	0.107143
TSI	95	3	0	193	3	0.0153061
CLM	56	4	0	116	4	0.0333333
PUR	54	1	0	109	1	0.00909091
MXL	63	3	0	129	3	0.0227273
All African	184	0	0	368	0	0
All East Asian	285	1	0	571	1	0.00174825
All European	358	16	0	732	16	0.0213904		CA MAF =	0.0265
All Hispanic	173	8	0	354	8	0.0220994
P575L	rs145553904	36563558	Major allele = G, minor allele = A
Group	m0	m1	m2	total_maj	total.min	MAF
LWK	97	0	0	194	0	0
YRI	87	0	0	174	0	0		EVS:
ASW	61	0	0	122	0	0		AA MAF =	0
CHB	97	0	0	194	0	0
CHS	100	0	0	200	0	0
JPT	89	0	0	178	0	0
CEU	82	0	0	164	0	0
FIN	91	2	0	184	2	0.0107527
GBR	87	0	0	174	0	0
IBS	14	0	0	28	0	0
TSI	98	0	0	196	0	0
CLM	60	0	0	120	0	0
PUR	55	0	0	110	0	0
MXL	66	0	0	132	0	0
All African	184	0	0	368	0	0
All East Asian	286	0	0	572	0	0
All European	372	2	0	746	2	0.0026738		CA MAF =	0.001853
All Hispanic	181	0	0	362	0	0
D537N	36563673		Major allele = C, minor allele = T
Group	m0	m1	m2	total_maj	total.min	MAF
LWK	97	0	0	194	0	0
YRI	87	0	0	174	0	0		EVS:
ASW	61	0	0	122	0	0		AA MAF =	NA
CHB	97	0	0	194	0	0
CHS	100	0	0	200	0	0
JPT	89	0	0	178	0	0
CEU	82	0	0	164	0	0
FIN	93	0	0	186	0	0
GBR	87	0	0	174	0	0
IBS	14	0	0	28	0	0
TSI	98	0	0	196	0	0
CLM	60	0	0	120	0	0
PUR	54	1	0	109	1	0.00909091
MXL	66	0	0	132	0	0
All African	184	0	0	368	0	0
All East Asian	286	0	0	572	0	0
All European	374	0	0	748	0	0		CA MAF =	NA
All Hispanic	180	1	0	361	1	0.00276243
T502M	rs117860804	36563777	Major allele = G, minor allele = A
Group	m0	m1	m2	total_maj	total.min	MAF
LWK	91	5	1	187	7	0.0360825
YRI	87	0	0	174	0	0		EVS:
ASW	58	3	0	119	3	0.0245902		AA MAF =	0.006255
CHB	61	31	5	153	41	0.21134
CHS	57	32	11	146	54	0.27
JPT	61	22	6	144	34	0.191011
CEU	82	0	0	164	0	0
FIN	92	1	0	185	1	0.00537634
GBR	87	0	0	174	0	0
IBS	14	0	0	28	0	0
TSI	98	0	0	196	0	0
CLM	55	5	0	115	5	0.0416667
PUR	55	0	0	110	0	0
MXL	63	3	0	129	3	0.0227273
All African	178	5	1	361	7	0.0190217
All East Asian	179	85	22	443	129	0.225524
All European	373	1	0	747	1	0.0013369		CA MAF =	0.001
All Hispanic	173	8	0	354	8	0.0220994
G495G	rs35495320	36563797	Major allele = C, minor allele = T
Group	m0	m1	m2	total_maj	total.min	MAF
LWK	70	25	2	165	29	0.149485
YRI	59	26	2	144	30	0.172414		EVS:
ASW	44	14	3	102	20	0.163934		AA MAF =	0.0654
CHB	19	57	21	95	99	0.510309
CHS	27	51	22	105	95	0.475
JPT	24	39	26	87	91	0.511236
CEU	82	0	0	164	0	0
FIN	85	8	0	178	8	0.0430108
GBR	87	0	0	174	0	0
IBS	14	0	0	28	0	0
TSI	97	1	0	195	1	0.00510204
CLM	38	18	4	94	26	0.216667
PUR	42	11	2	95	15	0.136364
MXL	29	30	7	88	44	0.333333
All African	129	51	4	309	59	0.160326
All East Asian	70	147	69	287	285	0.498252
All European	365	9	0	739	9	0.0120321		CA MAF =	0.00346
All Hispanic	109	59	13	277	85	0.234807
R434H		36563981	Major allele = C, minor allele = T
Group	m0	m1	m2	total_maj	total.min	MAF
LWK	97	0	0	194	0	0
YRI	87	0	0	174	0	0		EVS:
ASW	61	0	0	122	0	0		AA MAF =	0.000557
CHB	97	0	0	194	0	0
CHS	100	0	0	200	0	0
JPT	89	0	0	178	0	0
CEU	82	0	0	164	0	0
FIN	92	1	0	185	1	0.00537634
GBR	86	1	0	173	1	0.00574713
IBS	14	0	0	28	0	0
TSI	98	0	0	196	0	0
CLM	60	0	0	120	0	0
PUR	55	0	0	110	0	0
MXL	66	0	0	132	0	0
All African	184	0	0	368	0	0
All East Asian	286	0	0	572	0	0
All European	372	2	0	746	2	0.0026738		CA MAF =	0.000882
All Hispanic	181	0	0	362	0	0
G357R		36564213	Major allele = C, minor allele = G
EVS:
AA MAF =	0
CA MAF =	0.000292
R155Q	rs75864656	36564818	Major allele = C, minor allele = T
Group	m0	m1	m2	total_maj	total.min	MAF
LWK	95	2	0	192	2	0.0103093
YRI	85	2	0	172	2	0.0114943		EVS:
ASW	59	2	0	120	2	0.0163934		AA MAF =	0.0018
CHB	87	10	0	184	10	0.0515464
CHS	85	15	0	185	15	0.075
JPT	79	9	1	167	11	0.0617978
CEU	81	1	0	163	1	0.00609756
FIN	93	0	0	186	0	0
GBR	87	0	0	174	0	0
IBS	14	0	0	28	0	0
TSI	98	0	0	196	0	0
CLM	56	4	0	116	4	0.0333333
PUR	55	0	0	110	0	0
MXL	63	3	0	129	3	0.0227273
All African	180	4	0	364	4	0.0108696
All East Asian	251	34	1	536	36	0.0629371
All European	373	1	0	747	1	0.0013369		CA MAF =	0
All Hispanic	174	7	0	355	7	0.019337
A35A	rs57985157	36565739	Major allele = C, minor allele = T
Group	m0	m1	m2	total_maj	total.min	MAF
LWK	92	5	0	189	5	0.0257732
YRI	79	8	0	166	8	0.045977		EVS:
ASW	59	2	0	120	2	0.0163934		AA MAF =	0.027822
CHB	44	49	4	137	57	0.293814
CHS	68	25	7	161	39	0.195
JPT	40	41	8	121	57	0.320225
CEU	82	0	0	164	0	0
FIN	88	5	0	181	5	0.0268817
GBR	87	0	0	174	0	0
IBS	14	0	0	28	0	0
TSI	97	1	0	195	1	0.00510204
CLM	44	15	1	103	17	0.141667
PUR	43	12	0	98	12	0.109091
MXL	32	28	6	92	40	0.30303
All African	171	13	0	355	13	0.0353261
All East Asian	152	115	19	419	153	0.267483
All European	368	6	0	742	6	0.00802139		CA MAF =	0.003278
All Hispanic	119	55	7	293	69	0.190608
G3R	rs115156902	36565837	Major allele = C, minor allele = T
Group	m0	m1	m2	total_maj	total.min	MAF
LWK	97	0	0	194	0	0
YRI	87	0	0	174	0	0		EVS:
ASW	61	0	0	122	0	0		AA MAF =	0.000272
CHB	97	0	0	194	0	0
CHS	100	0	0	200	0	0
JPT	89	0	0	178	0	0
CEU	79	3	0	161	3	0.0182927
FIN	93	0	0	186	0	0
GBR	87	0	0	174	0	0
IBS	14	0	0	28	0	0
TSI	97	1	0	195	1	0.00510204
CLM	60	0	0	120	0	0
PUR	55	0	0	110	0	0
MXL	66	0	0	132	0	0
All African	184	0	0	368	0	0
All East Asian	286	0	0	572	0	0
All European	370	4	0	744	4	0.00534759		CA MAF =	0
All Hispanic	181	0	0	362	0	0
